# Supplementary material for: Development and Validation of Fluorinated, Aromatic Amino Acid Parameters for Use with the AMBER ff15ipq Protein Force Field
Source: PubMed Central journal article supplement — J Phys Chem A. 2022 Mar 30;126(14):2286–97. doi: 10.1021/acs.jpca.2c00255 (PMC9014858; doi:10.1021/acs.jpca.2c00255), 2022-03-30
Supplement: jp2c00255_si_001.pdf [file jp2c00255_si_001.pdf]

**Supporting Information for:**  
**Development and Validation of Fluorinated, Aromatic Amino Acid**  
**Parameters for use with the AMBER ff15ipq Protein Force Field**

Darian T. Yang<sup>1, 2, 3</sup>, Angela M. Gronenborn<sup>2\*</sup>, Lillian T. Chong<sup>3\*</sup>.

<sup>1</sup> Molecular Biophysics and Structural Biology Graduate Program, University of Pittsburgh and Carnegie Mellon University, Pittsburgh, Pennsylvania 15260, United States

<sup>2</sup> Department of Structural Biology, University of Pittsburgh School of Medicine, Pittsburgh, Pennsylvania 15260, United States

<sup>3</sup> Department of Chemistry, University of Pittsburgh, Pittsburgh, Pennsylvania 15260, United States

\*Corresponding authors: [ltchong@pitt.edu](mailto:ltchong@pitt.edu) and [amg100@pitt.edu](mailto:amg100@pitt.edu)

## Supporting Figures

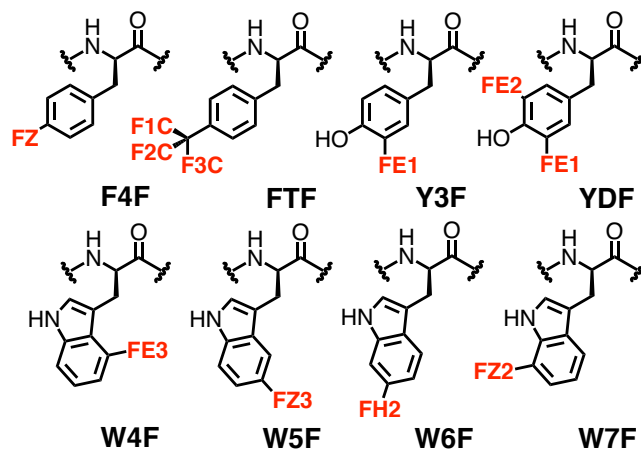

**Figure S1.** New fluorinated residue atom names presented in this work and their respective 3-letter identifier codes. The substituted fluorine atom is shown in red.

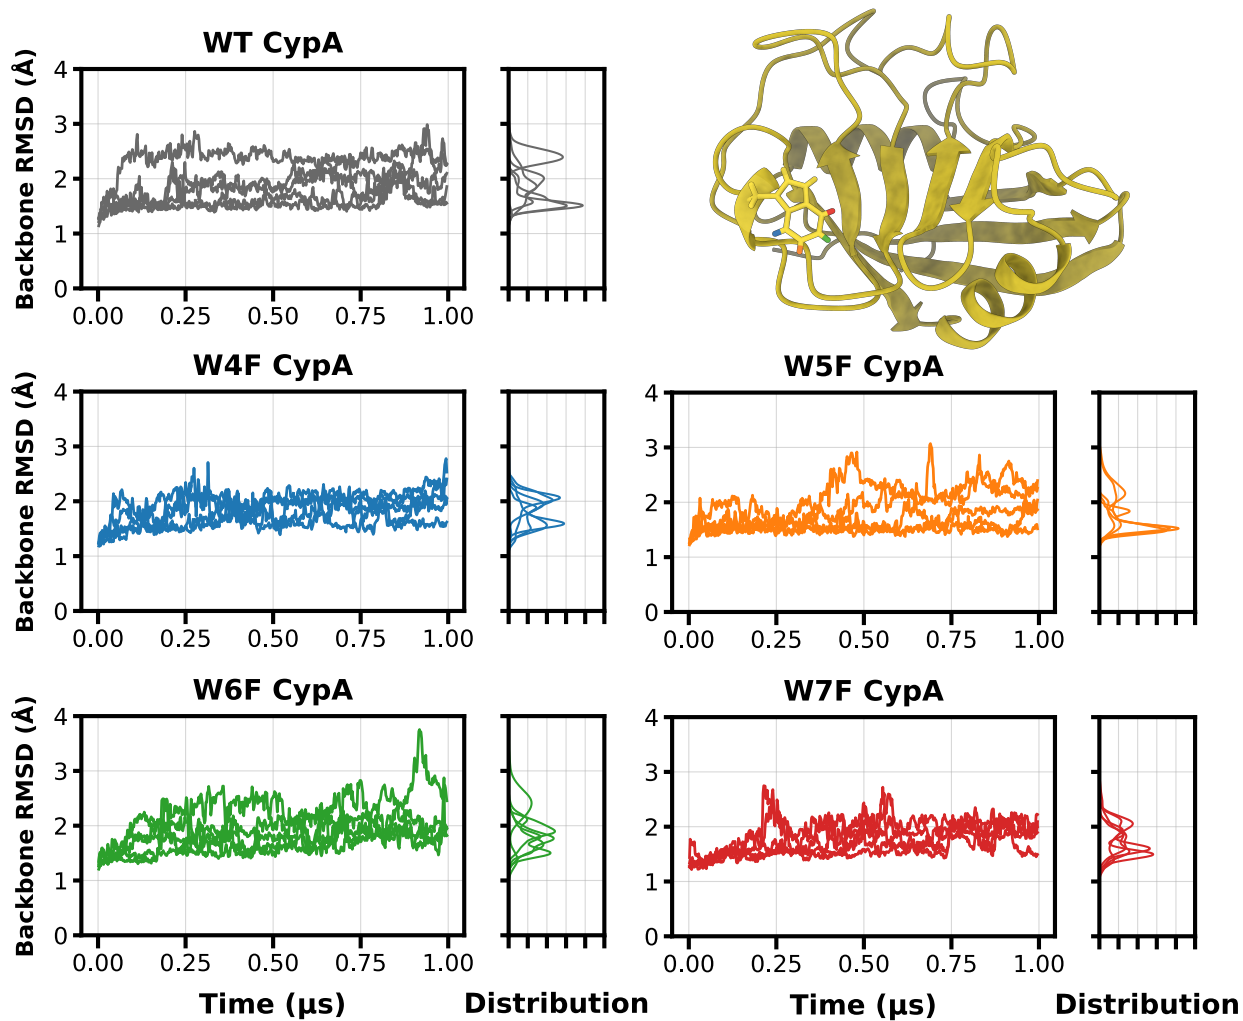

**Figure S2.** Backbone RMSD values with respect to the experimental X-ray structure (PDB: 3K0N)<sup>63</sup> coordinates for wild-type and fluorinated CypA proteins extracted from each of the five independent 1  $\mu\text{s}$  simulation replicates. The distribution of RMSD values is shown for each protein. The protein X-ray structure is shown in ribbon representation in the upper-right with individual fluorine positions on the Trp121 indole ring color coded like the trajectory plots.

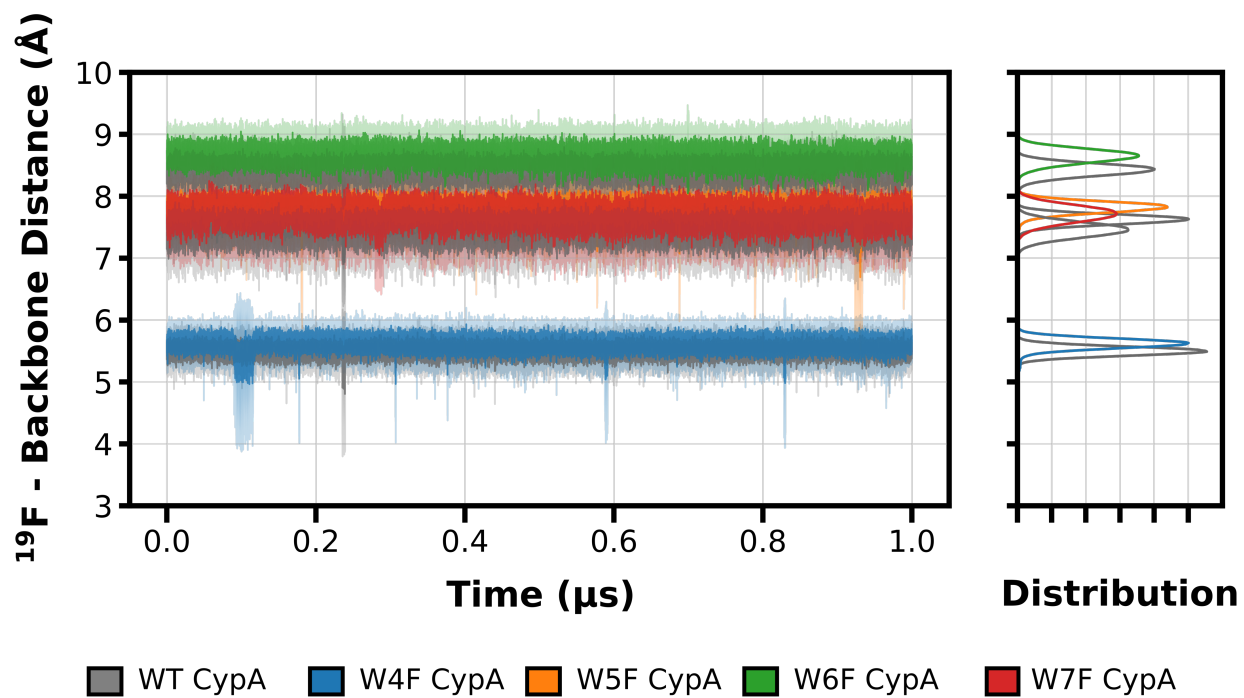

**Figure S3.** Average distance between the center of mass of the fluorine atom and the backbone carbonyl  $\pm$  the standard deviation over the simulation time course for the fluorinated CypA variants. The distance for the hydrogen atom and the backbone carbonyl for wild-type CypA is shown in grey. This data represents all five independent replicate simulations of 1  $\mu\text{s}$  each for each system.

(A)

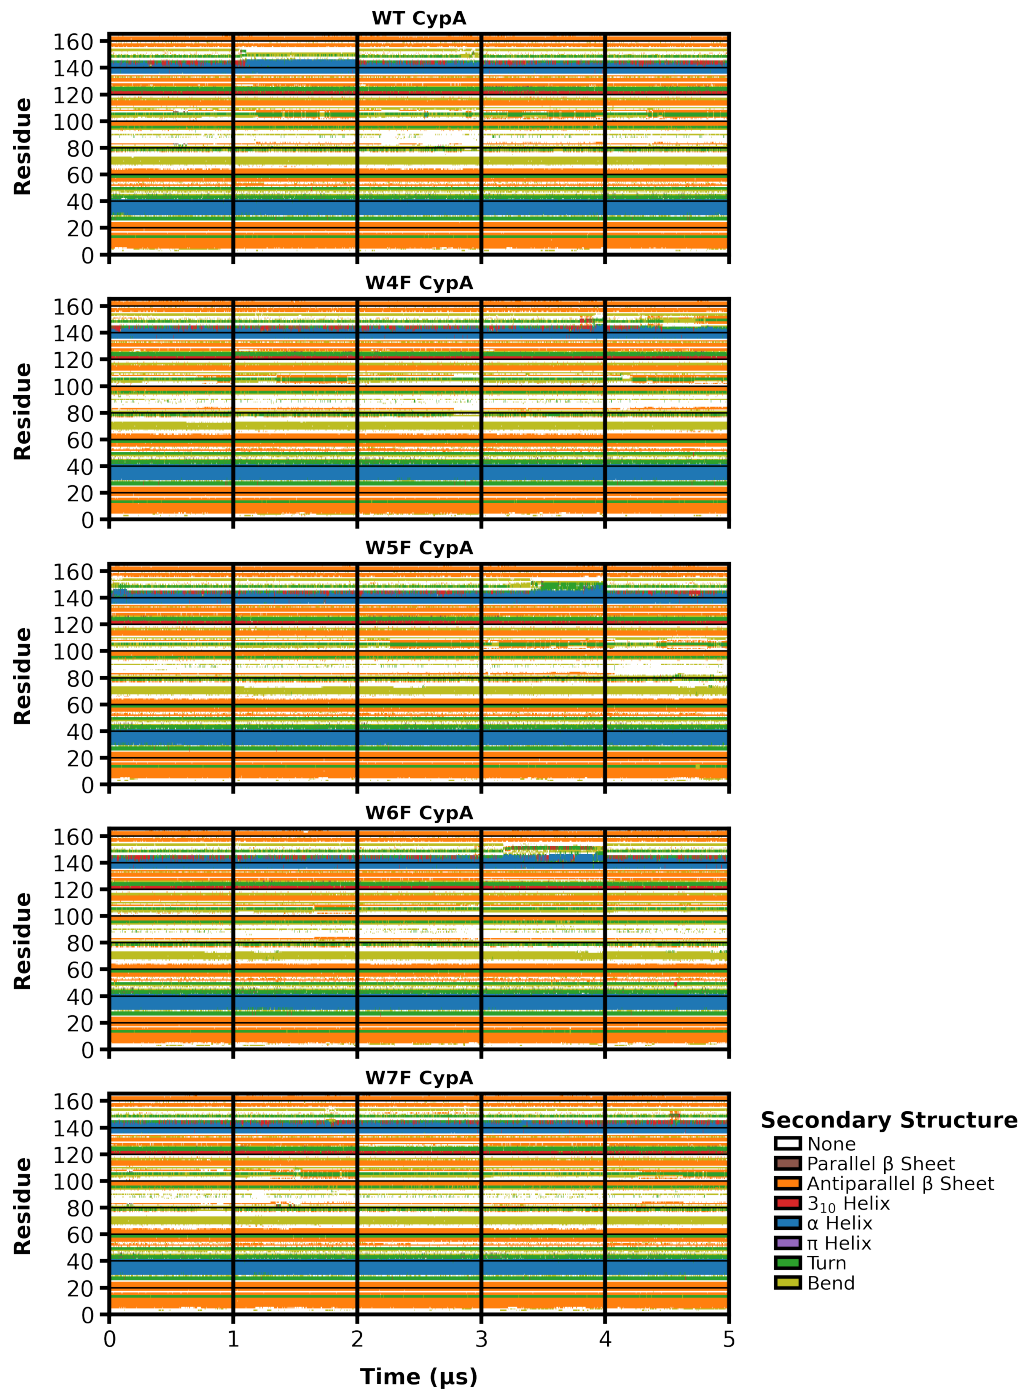

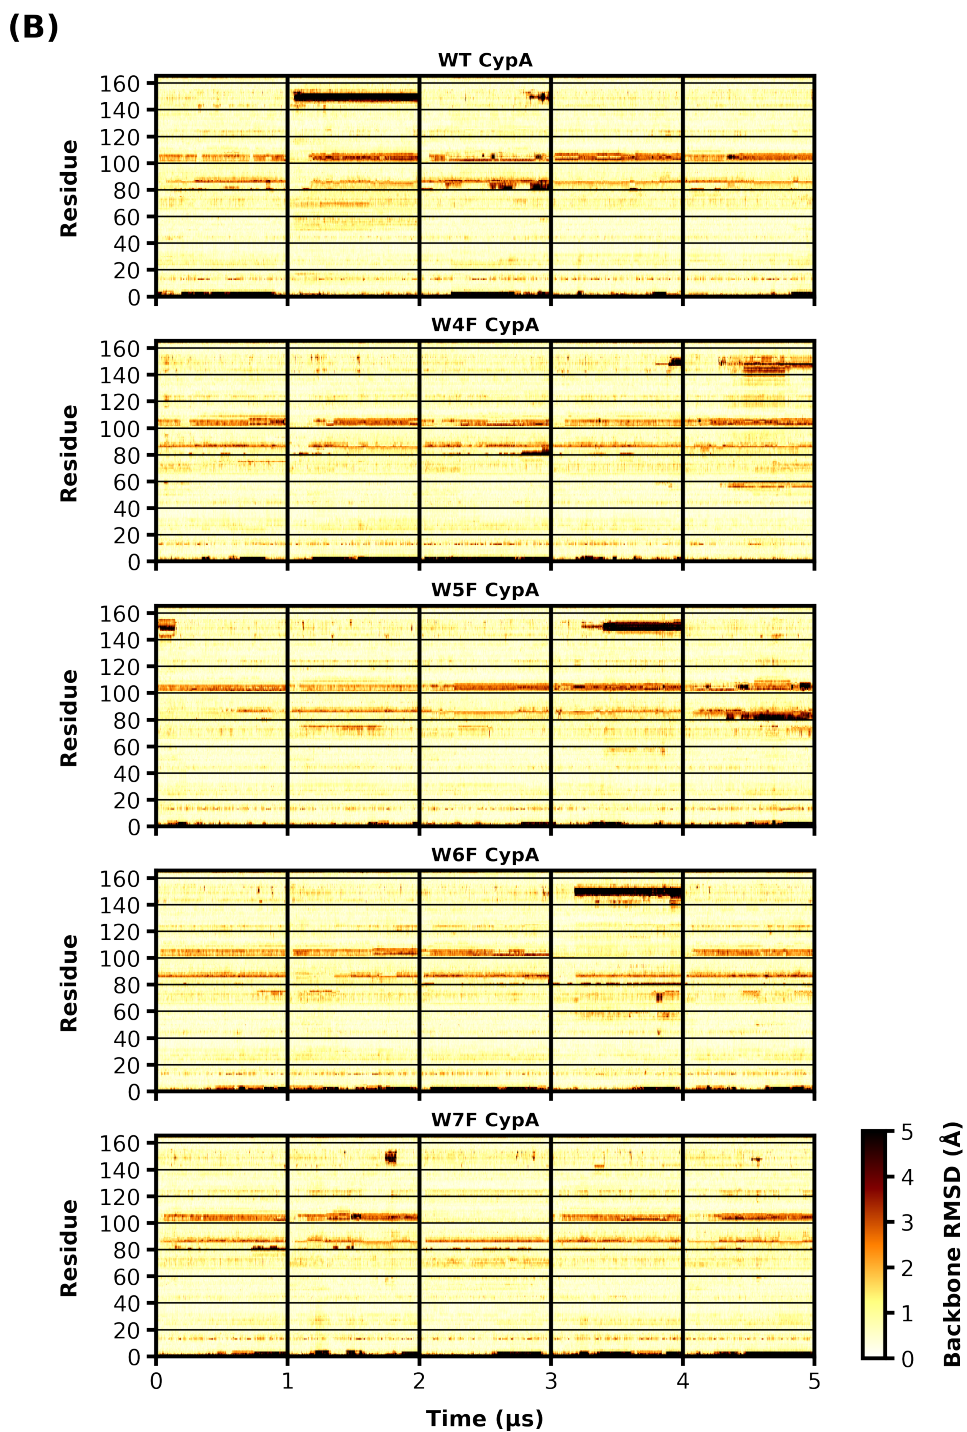

**Figure S4.** Secondary structure (A) and per residue backbone RMSD values (B) with respect to the crystal structure for both native CypA and the fluorinated variants. Each 1  $\mu$ s simulation was replicated five times (separated by vertical lines) for a discontinuous simulation time of 5  $\mu$ s for each system.

(A)

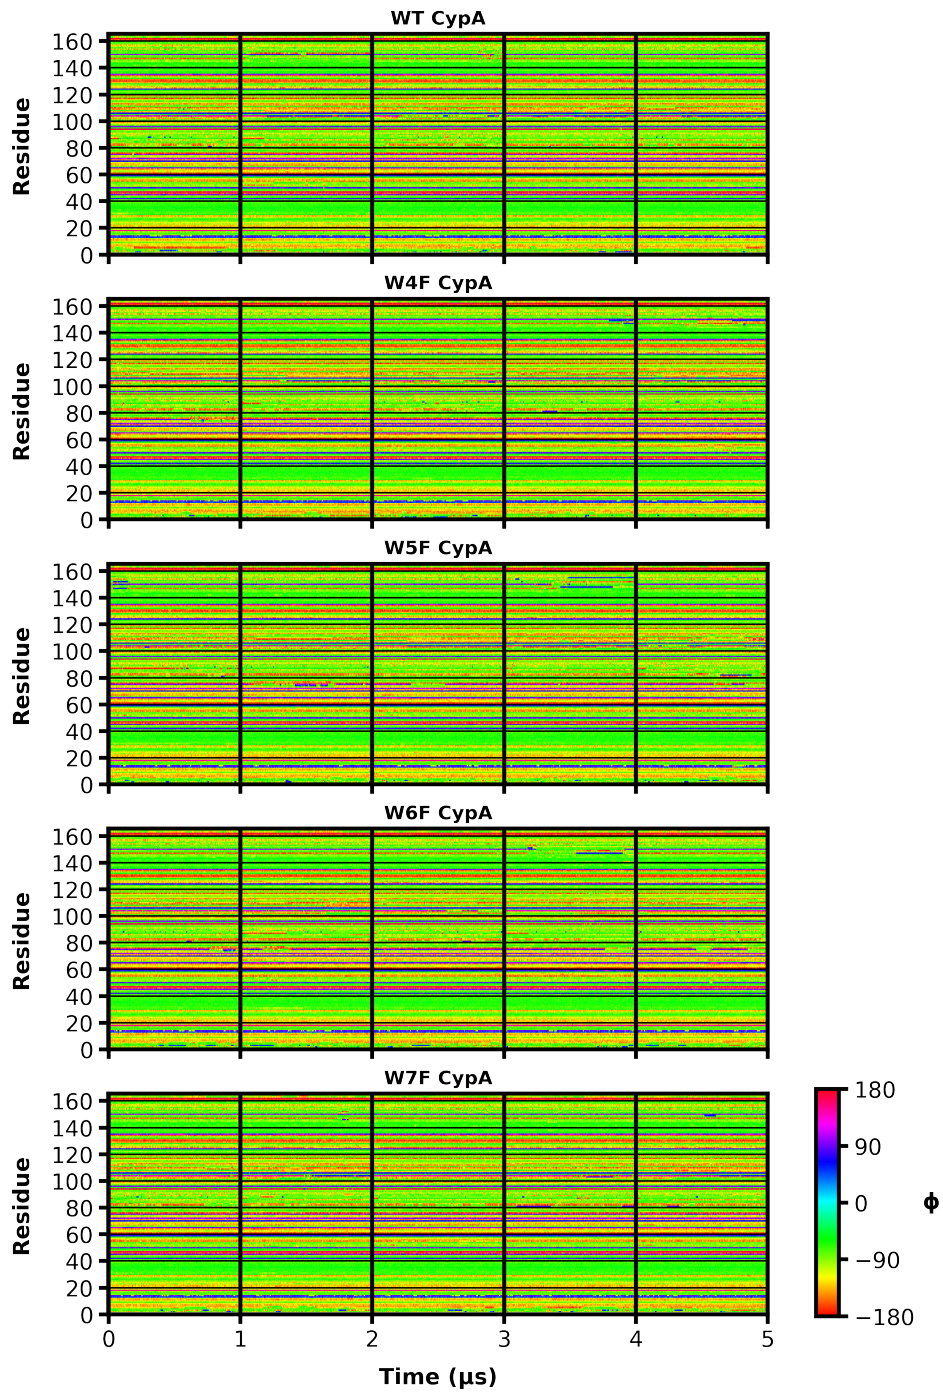

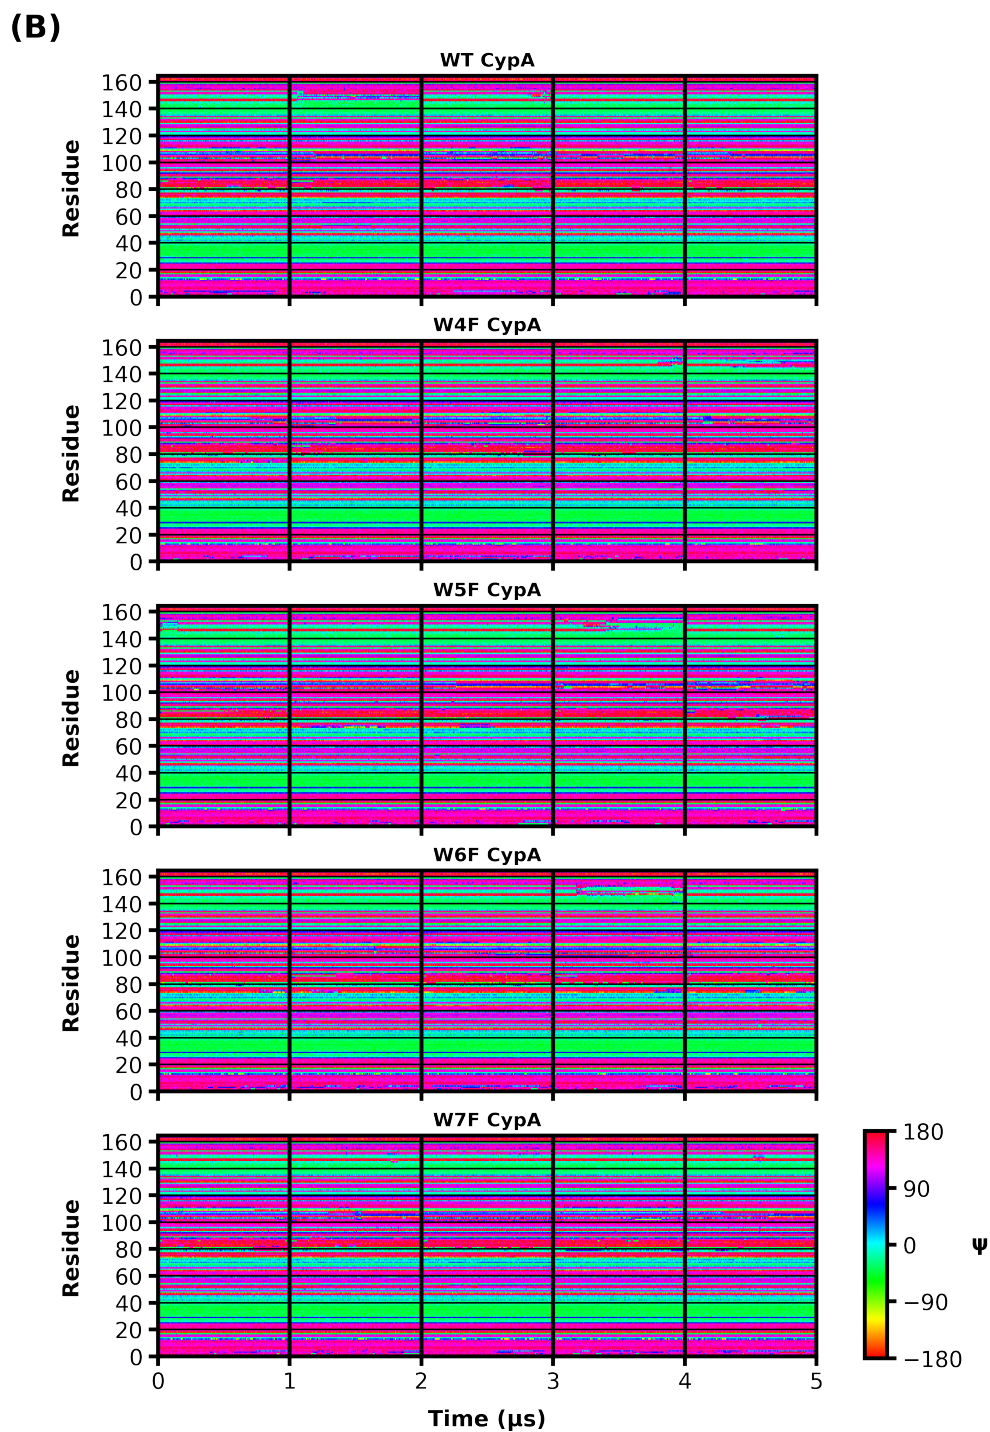

**Figure S5.** The per-residue  $\Phi$  (A) and  $\Psi$  (B) dihedral angle variations for wild-type CypA and the fluorinated variants. Each 1  $\mu\text{s}$  simulation was replicated five times (separated by vertical lines) for a discontinuous simulation time of 5  $\mu\text{s}$  for each system.



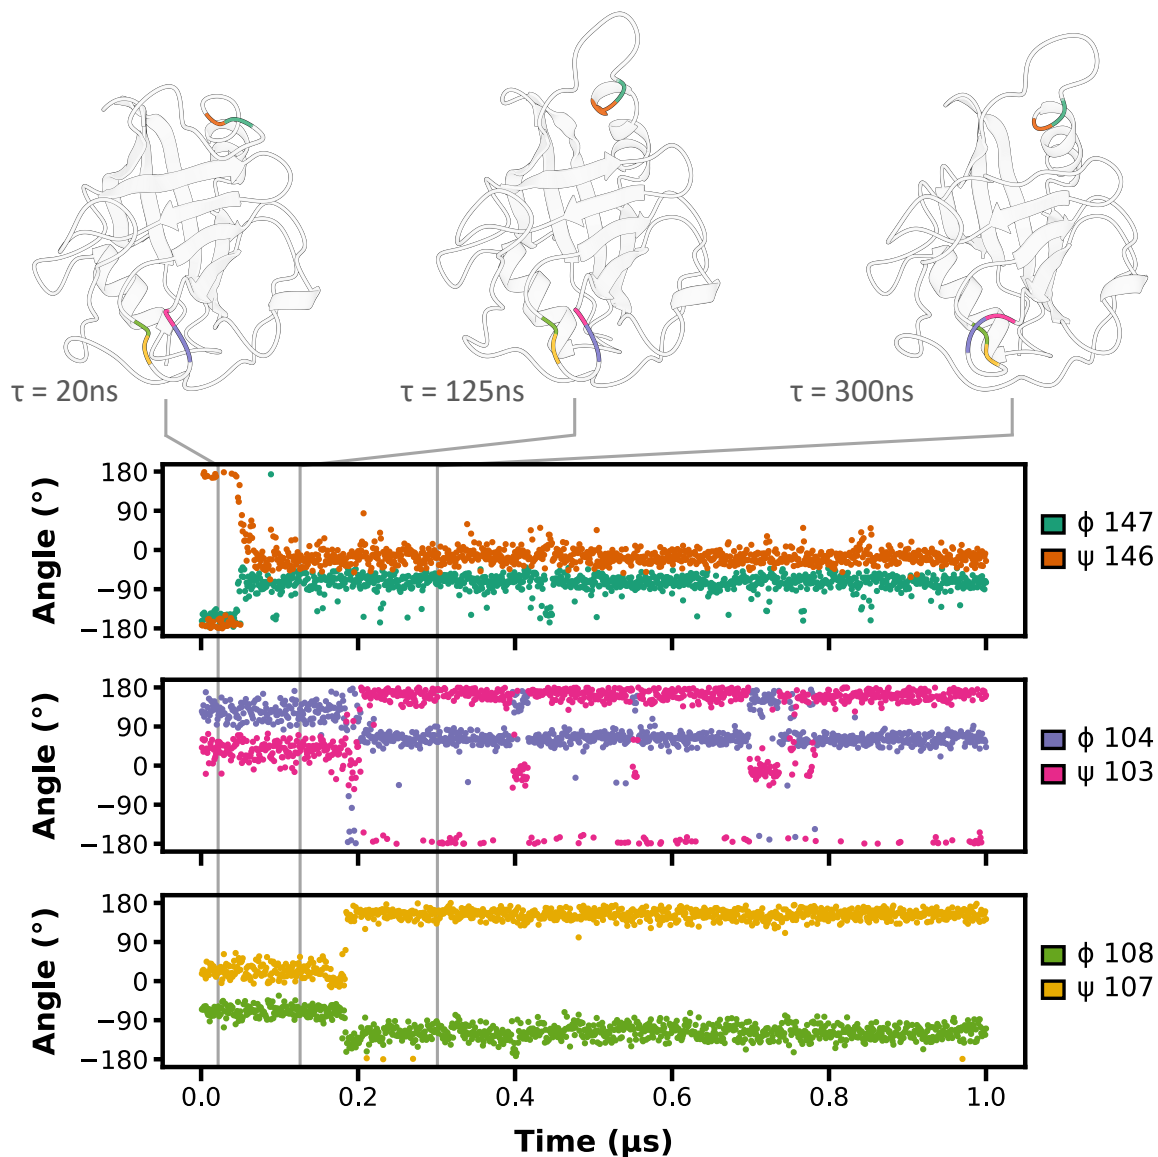

**Figure S6.** The  $\Phi$  and  $\Psi$  dihedral angles of key neighboring residues around the amino acid exhibiting the jumps in backbone RMSD in Figure S4, taken from a representative 1  $\mu\text{s}$  simulation of the non-fluorinated, wild-type CypA protein. Changes in adjacent dihedral angles are in opposite direction to the original jump, indicative of peptide-plane flips. The structures of relevant timepoints are shown in ribbon representation with the respective dihedrals of interest colored according to the legend.

## Supporting Tables

**Table S1.** Bond, angle, and torsion terms for the current set of fluorinated amino acid parameters.

| <b>Bond</b>     | <b>Force Constant<br/>(kcal/mol/Å<sup>2</sup>)</b>   | <b>Bond Length (Å)</b> |                    |
|-----------------|------------------------------------------------------|------------------------|--------------------|
| 3C-CA           | 317.4204                                             | 1.5100                 |                    |
| 3C-F            | 367.0233                                             | 1.3800                 |                    |
|                 |                                                      |                        |                    |
| <b>Angle</b>    | <b>Force Constant<br/>(kcal/mol/rad<sup>2</sup>)</b> | <b>Angle (°)</b>       |                    |
| CB-CA-F         | 109.3865                                             | 133.44                 |                    |
| CN-CA-F         | 53.6158                                              | 118.76                 |                    |
| C –CA-F         | 55.5980                                              | 120.15                 |                    |
| 3C-CA-CA        | 70.9193                                              | 119.54                 |                    |
| CA-3C-F         | 96.9340                                              | 111.90                 |                    |
| F—3C-F          | 98.1332                                              | 107.08                 |                    |
|                 |                                                      |                        |                    |
| <b>Dihedral</b> | <b>Barrier Height<br/>(kcal/mol)</b>                 | <b>Phase Angle (°)</b> | <b>Periodicity</b> |
| F -3C-CA-CA     | 3.83580                                              | 0.0                    | 2.0                |

**Table S2.** PDB identifier codes of protein structures containing fluorinated amino acids. Of these protein structures, over 73% were solved to better than 2 Å resolution. The average resolution of all structures is 1.60 ± 0.37 Å.

|            |      |      |      |      |      |      |      |
|------------|------|------|------|------|------|------|------|
| <b>W4F</b> | 5O7W | 4B2J | 6SZZ |      |      |      |      |
| <b>W5F</b> | 6YGW | 6YH2 | 1NEY | 6YYZ | 6YGM | 6YHD | 6YGO |
|            | 5O7V | 6YGP | 6YGX | 5OLX | 6YGL | 6YH3 | 6YGY |
|            | 6YHE | 5K3C | 6YH1 | 1NF0 | 4NAM | 5CVT | 1I45 |
|            | 6YGZ | 5CTJ | 5FWG | 5OLY | 7JT4 | 7M8Q | 6V5T |
|            | 7M8R | 5OLW | 6V64 | 2ZNX | 2JT8 | 2JTZ |      |
| <b>W6F</b> | 4EAR |      |      |      |      |      |      |
| <b>W7F</b> | 5O7U |      |      |      |      |      |      |
| <b>F4F</b> | 6T00 | 6OS8 | 1ZNT | 2MUZ |      |      |      |
| <b>FTF</b> | 7RFD |      |      |      |      |      |      |
| <b>Y3F</b> | 4QZS | 1XIL | 6OG8 | 1RRX | 3FYG |      |      |
| <b>YDF</b> | 6XLS | 6BPU | 6BPV | 6BPR | 6BPS | 5CI0 | 6BPT |

**Table S3.** Average  $\pm$  one standard deviation, minimum, and maximum  $\Delta\Delta G$  values of the relative free energy difference of the tetrapeptide with a fluorine substituted residue, compared to the same peptide with a non-fluorinated amino acid.

| Peptide | Avg $\Delta\Delta G$ (kcal/mol) | Min $\Delta\Delta G$ (kcal/mol) | Max $\Delta\Delta G$ (kcal/mol) |
|---------|---------------------------------|---------------------------------|---------------------------------|
| W4F     | 0.158 $\pm$ 0.162               | -0.312                          | 0.637                           |
| W5F     | 0.089 $\pm$ 0.137               | -0.378                          | 0.530                           |
| W6F     | -0.007 $\pm$ 0.139              | -0.626                          | 0.547                           |
| W7F     | 0.062 $\pm$ 0.137               | -0.484                          | 0.474                           |
| Y3F     | 0.088 $\pm$ 0.196               | -0.457                          | 0.651                           |
| YDF     | 0.030 $\pm$ 0.228               | -0.554                          | 0.551                           |
| F4F     | 0.273 $\pm$ 0.186               | -0.367                          | 0.881                           |
| FTF     | 0.203 $\pm$ 0.268               | -0.534                          | 0.859                           |

**Table S4.** Experimental NMR principal components of the CSA tensor, reduced anisotropy, and asymmetry parameters for fluoro-substituted tryptophan powders<sup>78</sup>. These values were used to calculate the relaxation rates from MD simulations for each respective CypA variant.

|           | $\sigma_{11}$ (ppm) | $\sigma_{22}$ (ppm) | $\sigma_{33}$ (ppm) | $\delta_{\sigma}$ (ppm) | $\eta$ |
|-----------|---------------------|---------------------|---------------------|-------------------------|--------|
| 4F-DL-Trp | 11.2                | -48.3               | -112.8              | 62.8                    | 0.9    |
| 5F-DL-Trp | 4.8                 | -60.5               | -86.1               | 52.1                    | 0.5    |
| 6F-DL-Trp | 12.9                | -51.2               | -91.6               | 56.2                    | 0.7    |
| 7F-DL-Trp | 4.6                 | -48.3               | -123.3              | 67.6                    | 0.8    |

**Table S5.** Comparison between the experimental <sup>19</sup>F NMR relaxation rates and those extracted from MD simulations. Each value  $\pm$  one standard deviation is listed.

| System   | Experimental             |                          | Average $\pm$ $\sigma$ from MD –<br>All protons < 3Å |                          |
|----------|--------------------------|--------------------------|------------------------------------------------------|--------------------------|
|          | $R_1$ (s <sup>-1</sup> ) | $R_2$ (s <sup>-1</sup> ) | $R_1$ (s <sup>-1</sup> )                             | $R_2$ (s <sup>-1</sup> ) |
| W4F CypA | 1.99 $\pm$ 0.05          | 109.1 $\pm$ 4.9          | 1.89 $\pm$ 0.55                                      | 121.3 $\pm$ 4.94         |
| W5F CypA | 1.19 $\pm$ 0.02          | 64.8 $\pm$ 2.5           | 0.94 $\pm$ 0.27                                      | 68.1 $\pm$ 2.47          |
| W6F CypA | 1.25 $\pm$ 0.01          | 63.0 $\pm$ 3.9           | 0.97 $\pm$ 0.27                                      | 84.1 $\pm$ 2.47          |
| W7F CypA | 1.20 $\pm$ 0.01          | 109.6 $\pm$ 1.9          | 0.99 $\pm$ 0.31                                      | 120.9 $\pm$ 2.82         |
